# Supplementary material for: Facilitators and barriers to chlamydia testing in general practice for young people using a theoretical model (COM-B): a systematic review protocol
Source: PubMed Central journal article supplement (PMC5353274; doi:10.1136/bmjopen-2016-013588), 2017-03-09
Supplement: bmjopen-2016-013588supp_appendix2.pdf [file bmjopen-2016-013588supp_appendix2.pdf]

## **Appendix 2: Search Strategy for MEDLINE (via Ovid platform)**

1. chlamydia\*.tw.
2. c trachomatis.tw.
3. exp Chlamydia Infections/
4. exp Chlamydia trachomatis/
5. 1 or 2 or 3 or 4
6. screen\*.tw.
7. detect\*.tw.
8. test.tw.
9. tests.tw.
10. testing.tw.
11. diagnos\*.tw.
12. 6 or 7 or 8 or 9 or 10 or 11
13. general practice\* .tw.
14. general practitioner\*.tw.
15. GP.tw.
16. primary care.tw.
17. family practice.tw.
18. family practitioner\*.tw.
19. family medicine.tw.
20. family physician.tw.
21. primary health care.tw.
22. primary healthcare.tw.
23. primary care nurs\*.tw.
24. general practice nurs\*.tw.

25. nurse practitioner\*.tw.
26. 13 or 14 or 15 or 16 or 17 or 18 or 19 or 20 or 21 or 22 or 23 or 24 or 25
27. barrier\*.tw.
28. enabler\*.tw.
29. facilitator\*.tw.
30. attitude\*.tw.
31. feasibility.tw.
32. 27 or 28 or 29 or 30 or 31
33. 5 and 12 and 26 and 32
34. limit 33 to yr="2000 – 2016"
